# Supplementary material for: Development of the Sm14/GLA-SE Schistosomiasis Vaccine Candidate: An Open, Non-Placebo-Controlled, Standardized-Dose Immunization Phase Ib Clinical Trial Targeting Healthy Young Women
Source: MDPI journal article supplement (doi:10.3390/vaccines10101724), 2022-10-15
Supplement: s1 [file s1]

**Supplemental Table S1.**  
**Demographic characteristics of the female participants at the baseline**

|                                                 | <b>Mean (Standard deviation)</b> | <b>Median (Minimum – Maximum)</b> | <b>% (n = 10)</b> |
|-------------------------------------------------|----------------------------------|-----------------------------------|-------------------|
| Age (in years)                                  | 36.3 (6.8)                       | 36 (26, 48)                       |                   |
| Race*                                           |                                  |                                   |                   |
| Caucasian                                       |                                  |                                   | 20 (2)            |
| Black                                           |                                  |                                   | 10 (1)            |
| Multiple ethnicities                            |                                  |                                   | 70 (7)            |
| Smoking,% using or used **                      |                                  |                                   | 40 (4)            |
| Alcohol consumption <sup>†</sup>                |                                  |                                   | 0 (0)             |
| Use of illegal drugs <sup>††</sup>              |                                  |                                   | 10 (1)            |
| Recent vaccination                              |                                  |                                   |                   |
| No                                              |                                  |                                   | 90 (9)            |
| Yes                                             |                                  |                                   | 10 (1)            |
| Previous disease/condition <sup>§</sup> , % yes |                                  |                                   | 80 (8)            |
| HIV, % negative                                 |                                  |                                   | 100 (10)          |

n = number of participants

\*\* One participant had stopped smoking 8 years prior to study

<sup>†</sup>No participant reported alcohol addiction.

<sup>††</sup> Participant reported the use of cocaine for 2 months but has stopped one year before inclusion in the study.

<sup>§</sup> List of concomitant diseases/conditions:

- cervix conization due to neoplasia (2010), light cutaneous rash (2013), hypermenorrhea (2011), twisted ankle with light pain and edema (2013), tubal ligation (1995), menstrual cramps (2011 active)
- allergic rhinitis (2013), tubal ligation (2010), monthly menstrual cramps
- tubal ligation (2005), surgical procedure for leg varicose veins (2013)
- sinusitis due to allergy (2013)
- light erysipelas (2013), repeated erysipelas, light (2011), removal of breast fibroma (1998)
- tubal ligation (1995), menstrual cramps (1995)
- Chronic arthrosis of the knee, bilateral (2010)
- Unspecified convulsions (2003, inactive), pharyngitis, light (2013, active)
